23

24 **Abstract**

25 The type II secretion system (T2SS) is a multi-protein envelope-spanning assembly that  
26 translocates a wide range of virulence factors, enzymes and effectors through the outer  
27 membrane (OM) of many Gram-negative bacteria. Here, using electron cryotomography and  
28 subtomogram averaging methods, we present the first *in situ* structure of an intact T2SS, imaged  
29 within the human pathogen *Legionella pneumophila*. Although the T2SS has only limited  
30 sequence and component homology with the evolutionarily-related Type IV pilus (T4P) system,  
31 we show that their overall architectures are remarkably similar. Despite similarities, there are  
32 also differences, including for instance that the T2SS-ATPase complex is usually present but  
33 disengaged from the inner membrane, the T2SS has a much longer periplasmic vestibule, and it  
34 has a short-lived flexible pseudopilus. Placing atomic models of the components into our ECT  
35 map produced a complete architectural model of the intact T2SS that provides new insights into  
36 the structure and function of its components, its position within the cell envelope, and the  
37 interactions between its different subcomplexes. Overall, these structural results strongly support  
38 the piston model for substrate extrusion.

39

40

## 41 **Introduction**

42

43 The T2SS is one of seven known protein secretion systems that are used by Gram-negative  
44 bacteria to deliver proteins (effectors) across their double-membraned envelope and into the  
45 extracellular environment or into host cells<sup>1,2</sup>. Evolutionarily-related to bacterial type IV pili<sup>3,4</sup>,  
46 canonical T2SS are mainly distributed among genera of *Proteobacteria*, including  
47 representatives within  $\alpha$ -,  $\beta$ -,  $\gamma$ -, and  $\delta$ -proteobacteria<sup>2,5,6</sup>. However, related systems may also  
48 exist within *Spirochaetes* and *Chlamydiae*, and several other phyla<sup>6</sup>. The T2SS is functional in  
49 many species that are pathogenic for humans, animals, and/or plants, secreting a broad range of  
50 toxins, degradative enzymes, and other effectors<sup>6-10</sup>. Additionally, the T2SS is operative in a  
51 number of nonpathogenic, environmental bacteria and in some instances helps mediate symbiotic  
52 relationships<sup>6,11</sup>. Thus, understanding the structure and function of the T2SS is crucial,  
53 potentially assisting in the development of new strategies for battling bacterial infection<sup>12</sup>.

54

55 The T2SS apparatus generally employs 12 “core” components, which, for simplicity, will be  
56 referred to here as T2S C, D, E, F, G, H, I, J, K, L, M, and O<sup>6,13</sup>. These components have been  
57 described as being part of four subcomplexes<sup>6,13</sup>. The first subcomplex is a multimer of the T2S  
58 D protein that provides the ultimate portal or gate for substrate transit across the outer membrane  
59 (OM) and out of the cell; i.e., the so-called secretin<sup>14</sup>. Interacting with the secretin to create a  
60 periplasm-spanning channel is an inner membrane (IM)-anchored subcomplex or platform that is  
61 comprised of T2S F, L, and M<sup>15</sup>. The OM-associated subcomplex and the IM-associated  
62 subcomplexes are coupled by the IM-associated “clamp protein” T2S C<sup>15</sup>. The third sub-  
63 assemblage is a pseudopilus that consists of the major pseudopilin T2S G and minor pseudopilins  
64 T2S H, I, J, and K<sup>15</sup>. The pseudopilus is thought to span the periplasm within the channel created

65 by the interaction of the IM platform with the secretin and is believed to act in a “piston-“ or  
66 “screw-like” fashion to drive substrate through the OM portal<sup>6,16,17</sup>. The fourth subcomplex is a  
67 hexamer of T2S E, a cytoplasmic ATPase that is recruited to the IM in order to “power” the  
68 secretion process<sup>15</sup>. The T2S O protein is an IM peptidase that processes the pseudopilins prior to  
69 their assembly into the pseudopilus<sup>6,13</sup>.

70  
71 Structural studies of purified components and subcomplexes using crystallography, electron  
72 microscopy (EM) and nuclear magnetic resonance spectroscopy (NMR) have significantly  
73 improved our understanding of the T2SS. Some of the notable contributions include high-  
74 resolution structures of several secretins (T2S D) revealing that secretin exists as a  
75 pentadecamer<sup>18–22</sup>, crystal structures of different conformations of the T2SS ATPase T2S E<sup>23,24</sup>, a  
76 co-crystal structure of the periplasmic domains of T2S C and D<sup>25</sup>, a co-crystal structure of the  
77 T2S I, J, K minor pseudopilin complex<sup>26</sup>, a cryoEM structure of the major pseudopilin polymer<sup>27</sup>  
78 and crystal structures of the soluble domains of T2S L and M<sup>28,29</sup>. Despite these advances, it is  
79 still not clear how the different components of the T2SS are positioned and interact with each  
80 other within an intact cell envelope (*in situ*). In recent years, electron cryotomography (ECT) has  
81 emerged as a powerful tool for studying dynamic multi-protein molecular machines *in situ* in  
82 their near native state<sup>30</sup>. Here, we used ECT and subtomogram averaging to reveal the first *in situ*  
83 structure of a complete T2SS. We imaged the T2SS in *Legionella pneumophila*, a pathogenic  
84 bacterium for which the biological significance of T2SS and its substrates has been extensively  
85 documented, including roles in sliding motility, lung disease, intracellular infection of  
86 macrophages and amoebae, and suppression of innate immunity<sup>31–37</sup>.

87  
88

89 **Results**  
90

91 **Structural details of the *L. pneumophila* T2SS *in situ***

92 To reveal the intact structure of the bacterial T2SS *in situ*, we used ECT to image nearly 2000  
93 frozen-hydrated *L. pneumophila* cells (Supplementary Table 1). In our tomograms, we observed  
94 multiple electron dense “hour-glass” shaped particles (Fig. 1A-D), reminiscent of the secretin  
95 structure<sup>14</sup>, in the periplasm. These structures were primarily localized in the vicinity of cell  
96 poles and were not associated with any exocellular filaments (Fig. 1A, B). We also observed  
97 several top views of these particles with a diameter ~10 nm (Fig. 1E, F). While *L. pneumophila*  
98 cells encode for a Type IVa pilus (T4aP) system, which also has a secretin<sup>38</sup>, several lines of  
99 evidence suggest that all the structures we saw were T2SSs. First, in our ~2000 tomograms, we  
100 did not see any T4aP filaments coming out of the *L. pneumophila* cells, suggesting that under our  
101 growth conditions, T4aP is not expressed. This is consistent with earlier observation in which 30  
102 °C was found to be better than 37 °C for the assembly of the T4aP systems<sup>38</sup> (our cells were  
103 grown at 37 °C). Second, no particles were visible in 38 tomograms of a strain lacking *L.*  
104 *pneumophila* T2SS components T2S DE (Fig. 1G), but they were still present in a strain lacking  
105 the T4aP secretin ( $\Delta pilQ$ ) (Fig. 1H). In a double deletion strain lacking the T2SS secretin as well  
106 as the T4aP secretin ( $\Delta lspDE, \Delta pilQ$ ), again no particles were visible (Fig. 1I, Supplementary  
107 Table 1). Finally, our analysis of the T2SS secretin revealed distinct features as compared to the  
108 T4aP secretin (see below), confirming that the “hour-glass” shaped particles are *L. pneumophila*  
109 T2SSs.

110

111 To reveal the *in situ* molecular architecture of the intact *L. pneumophila* T2SS, we generated a  
112 subtomogram average using 440 particles. In our initial average, the OM and secretin channel

113 resolved well, but the IM and associated structures were missing (Supplementary Fig. 1A),  
114 suggesting substantial flexibility between the OM-associated secretin complex and the rest. To  
115 overcome this, we performed focused alignment on the OM- and IM-associated subcomplexes  
116 separately and then combined the two well-aligned averages to produce our final composite  
117 structure (Fig. 1J, Supplementary Fig. 1A-C) which had a variable local resolution between ~2.5-  
118 4.5 nm as estimated by ResMap (Supplementary Fig. 1D). The final average revealed that the  
119 T2SS is composed of a ~23 nm long vestibule that reaches down most of the way through the  
120 periplasm and opens up in the OM with an ~8 nm wide pore (Fig. 1J). There are two distinct  
121 densities in the lumen of the secretin channel near the two ends: 1) a “gate” just underneath the  
122 OM pore and 2) a previously unreported structure, “plug”, near the base (Supplementary Fig.  
123 1E). Although the gate structure resolved well in our subtomogram average, the plug structure  
124 was poorly visible. Further analysis revealed that the plug is either not present or so dynamic in a  
125 subset of the particles that it is almost invisible in the final average (Supplementary Fig. 1E).  
126 Below the secretin channel, 7.5 away from the IM, there is a lower-periplasmic ring and a short  
127 stem at the same level (Fig. 1J). The lower-periplasmic ring is 17 nm wide in diameter (peak to  
128 peak) and the stem structure is in the middle of this ring (Fig. 1J). On the cytoplasmic side, there  
129 are three distinct densities: a dome-like density immediately below the IM, a ring-like density of  
130 diameter 20 nm (peak to peak) (cytoplasmic ring) surrounding the dome and finally, 13 nm away  
131 from the IM a 12-nm wide (peak to peak) cytoplasmic disk (Fig. 1J). A comparison between the  
132 subtomogram averages of the T2SS and the non-piliated *in situ* structures of the *Myxococcus*  
133 *xanthus* T4aP (*MxT4aP*) and the *Vibrio cholerae* toxin-coregulated (TCP) type IVb pilus  
134 (*VcT4bP*)<sup>39,40</sup> machines revealed that despite varied gene organization and limited component  
135 homology, the overall architectures of these three classes of molecular machines are strikingly

136 similar: Each contains an OM-associated secretin channel, a gate just below the OM, a lower-  
137 periplasmic ring near the IM, a stem, a cytoplasmic dome, a cytoplasmic ring and a cytoplasmic  
138 disk (Fig. 1 J-L, note cytoplasmic disks for the *MxT4aP* and *VcT4bP* are seen in other states. See  
139 Supplementary Fig. 1F).

140

141 Intriguingly, the *L. pneumophila* secretin (T2S D, aa = 791) sequence is shorter than the *MxT4aP*  
142 secretin (PilQ, aa = 901), but in the subtomogram averages, the *L. pneumophila* T2SS secretin  
143 channel is ~1.5 times longer than the *MxT4aP*. To rationalize this, we predicted domain  
144 architectures of secretins of the *L. pneumophila* T2SS (T2 D or LspD), *VcT4bP* (TcpC) and  
145 *MxT4aP* (PilQ) systems using Motif-search, Phyre and the CD-vist programs<sup>41,42</sup> (Fig. 1M). Our  
146 analysis revealed that all three secretins (*LpT2 D*, *MxPilQ* and *VcTcpC*) have conserved C-  
147 terminal secretin domains. However, preceding the secretin domain, TcpC and PilQ have only  
148 one N-domain, but T2S D has four (N3, N2, N1 and N0) (Fig. 1M, see the match of the secretin  
149 atomic models to the subtomogram average density described below and shown in  
150 Supplementary Fig. 2). N-domains are known to fold into rigid structures and thus resolved well  
151 in the subtomogram average<sup>39,43</sup>. In contrast, the N-terminal AMIN domains of PilQ spread on  
152 the peptidoglycan (PG) and are not ordered and thus remained indiscernible in the subtomogram  
153 average.

154

155 In our subtomogram average, we saw densities for the cytoplasmic dome, ring and disk of the  
156 T2SS (Fig. 1J). The cytoplasmic dome is also visible in the piliated as well as in the non-piliated  
157 state of the *MxT4aP* and *VcT4bP* machines (Fig. 1K,L, Supplementary Fig. 1F), but the

158 cytoplasmic ring and the disk are only visible in certain states of the *MxT4aP* and *VcTpcC*  
159 systems interpreted previously as assembly states (Fig. 1J-L, Supplementary Fig. 1F).

160

161 Our *in situ* structure provides the first glimpse of how the T2SS is positioned in the cell envelope  
162 with respect to the OM, PG and the IM. In our average, the secretin complex forms an OM-  
163 spanning pore. However, when we aligned available cryoEM structures of assembled secretin  
164 channels onto our density map based on the position of the gate (Supplementary Fig. 2), the tip  
165 of the secretin penetrated only the inner leaflet of the OM, suggesting secretin assemblies might  
166 have a different, more extended conformation *in vivo*, and collapse or change conformation  
167 during detergent extraction and purification.

168

169 To investigate if the T2SS is activated under the growth conditions used, we looked for T2SS-  
170 effector release in the *L. pneumophila* culture supernatant. Western blot analysis of the *L.*  
171 *pneumophila* culture supernatant showed consistent presence of the effectors CelA, ProA and  
172 LegP during mid-log phase and early stationary phase, suggesting that at least some of the T2SSs  
173 are active (Fig. 2P). Release of these effectors is T2SS-specific because a T2SS-nonfunctional  
174 mutant ( $\Delta lspDE$ ) did not release any of these effectors (Fig. 2P, lane 4). Interestingly, in a strain  
175 lacking the functional Dot/Icm type IV secretion system (T4SS), we found 25% more T2SS  
176 particles. However, this does not correlate with an increase in T2SS effector release, since both a  
177 mutant deleted for all *dot/icm* T4SS genes and a mutant lacking *dotH*, *dotG* and *dotF* did not  
178 exhibit consistent increases in T2SS effector release over many experiments (one experiment  
179 shown in Fig. 2P, lanes 2, 3). Since we see T2SS-effector release in the culture media, at least  
180 some of the T2SS particles are in actively-secreting states.



181  
182 In the T2SS, four minor pseudopilins (T2S I, J, K and H) and a major pseudopilin (T2S G)  
183 constitute a pseudopilus that is thought to act as a piston to extrude exo-proteins through the  
184 T2SS<sup>6,16,17</sup>. In mutant strains lacking the pseudopilins, the activity of the T2SS is severely  
185 impaired<sup>44</sup>. Since we did not see a pseudopilus in our subtomogram average (Fig. 1J), we  
186 carefully looked through all the individual T2SS particles in our tomograms and found that a  
187 fraction (~20%) of the particles had density likely from pseudopili (Fig. 2A-E). In these  
188 particles, the putative pseudopili extend (~ 14 nm) from the IM to the base of the T2S D channel.  
189 The positions of these densities are variable, however, so they remain invisible in the average.  
190 During this exercise, we also noticed that the lower-periplasmic ring densities in individual  
191 particles were just as visible as the secretin density, but their positions varied between particles,  
192 explaining why this density also resolved poorly in the subtomogram average (Fig. 2F-J).  
193 Further, there were also many particles with just the periplasmic vestibule and without a  
194 detectable pseudopilus or a lower-periplasmic ring (Fig. 2K-O). These particles are likely either  
195 assembly or disassembly intermediates.

196

### 197 **Architectural model of an intact T2SS**

198 Recently, Chang *et al* used a combination of ECT, subtomogram averaging and genetic  
199 manipulations to determine the locations of all the major components in the *MxT4aP* and  
200 *VcT4bP* systems and produced an architectural model of the *MxT4aP* machinery<sup>39,40</sup>. In order to  
201 assign the locations of T2SS components in our density map and build an architectural model of  
202 the T2SS, we performed a thorough sequence analysis and confirmed that the *L. pneumophila*  
203 T2SS components T2S C, D, E, F, G, and M are homologues of the T4aP components PilP, PilQ,

204 PilB, PilC, PilA and PilO respectively<sup>45</sup>. Interestingly, the cytoplasmic domain of T2S L is  
205 homologous to the T4aP component PilM (Phyre: 30% coverage, 97% confidence and 15%  
206 identity) and the periplasmic domain of T2S L is homologous to the T4aP component PilN  
207 (Phyre: 23% coverage, 78.6% confidence and 13% identity) suggesting T2S L is a fusion of the  
208 T4aP proteins PilM and PilN.

209

210 Since atomic models are available for all the soluble domains of the T2SS components<sup>14,15</sup>, we  
211 sought to build an architectural model of the intact T2SS guided by the T4aP model (Fig. 3). The  
212 *L. pneumophila* T2SS has a total of 12 components. We began by placing an atomic model of the  
213 OM protein T2S D/secretin (PDB ID: 5WQ8) in our density map. The position of T2S D along  
214 its axis (perpendicular to the cell envelope) was set by aligning the gate densities. The N1, N2  
215 and N3 domains of 5WQ8 matched well with the subtomogram average density map  
216 (Supplementary Fig. 2). While the N0 domain of secretin was not resolved in most of the  
217 previously reported single particle reconstructions, presumably due to flexibility, in our  
218 subtomogram average we saw an additional density for the N0 domain just below N1. Our  
219 interpretation is that the N0 domain is stabilized by the presence of its connecting subcomplexes  
220 and the rest of the cellular envelope. A co-crystal structure of the T2S D N0 domain and the C-  
221 terminal homology region (HR) domain of the clamp protein T2S C (PDB ID: 3OSS) was  
222 therefore placed in this density below the N1 domain. Since no oligomeric structure is available  
223 for T2S C, we used known information about symmetry, connectivities and orientation (e.g.  
224 towards membrane etc.) to first generate numerous 15-mer (the known symmetry of T2S D) ring  
225 models for 3OSS using SymmDock<sup>46</sup> and placed the ring model in the electron density map that  
226 fit the density best and satisfied all other criteria. Recently, Chernyatina *et al* showed that

227 *Klebsiella pneumoniae* T2S DLME constitute a 15:6:6:6 complex and 6-12 copies of T2S C are  
228 bound to this assembly<sup>21</sup>. Therefore, we removed 9 copies of T2S C randomly around the ring in  
229 the model to reflect this lowest stoichiometry and emphasize that not all T2S D's are bound by a  
230 T2S C<sup>21</sup>. Other than the C-terminal HR domain, *L. pneumophila* T2S C contains a periplasmic  
231 disordered region and an N-terminal transmembrane helix. We modeled the disordered region of  
232 T2S C and placed the N-terminal helix in the inner membrane.

233

234 The periplasmic domains of T2S L (PDB ID: 2W7V) and M (PDB ID: 1UV7) both fold into  
235 ferredoxin-like domains and are known to bind each other<sup>47</sup>. We used a T2S M dimer structure  
236 (PDB ID: 1UV7) to first generate a T2S ML heterodimer and then used SymmDock to produce  
237 several hexameric ring models of the T2S ML heterodimer. We selected the model that best  
238 matched the lower-periplasmic ring-density. To build a working model for the pseudopilus, we  
239 used a cryoEM structure of the major pseudopilin filament (PDB ID: 5WDA), a co-crystal  
240 structure of the minor pseudopilin complex T2S IJK (PDB ID: 3CI0) and a crystal structure of  
241 the minor pseudopilin T2S H (PDB ID: 2KNQ) and their known connectivities and  
242 interfaces<sup>26,27</sup>. Since in our tomograms we only found pseudopili extending from the IM to the  
243 base of the secretin channel, we found that ~5 copies of major pseudopilin (T2S G) and one copy  
244 of each of the minor pseudopilins (T2S I, J, K, H) were sufficient to extend this distance.

245

246 To begin to generate a working model for the cytoplasmic complex, we modelled a T2S F dimer  
247 structure based on the proposed structure of the T4aP homologue PilC<sup>40</sup> and placed this model in  
248 the cytoplasmic dome density. The T2SS ATPase T2S E has three distinct domains (N-terminal  
249 domains N1E, N2E and a C-terminal ATPase domain CTE) connected by two extended flexible

250 linkers. We used a hexameric structure of the N2E+CTE domains of T2S E (PDB ID: 4KSS) and  
251 a co-crystal structure of the cytoplasmic domain of T2S L and the N1E domain of T2S E (PDB  
252 ID: 4PHT) to build working models for the cytoplasmic disk and ring densities, respectively. The  
253 cytoplasmic ring is 20 nm wide in diameter in our average. Given the experimentally determined  
254 stoichiometry of six T2S L molecules per secretin channel, we first used SymmDock to generate  
255 candidate ring assemblies of six 4PHT complexes. Interestingly, out of 5000 candidate ring  
256 models, none had a diameter more than 17 nm. Our interpretation of this result is that the T2S  
257 L:N1E complex does not form a continuous ring *in situ*. Rather we simply placed six separate  
258 copies of 4PHT around the cytoplasmic ring with gaps in between. The 4KSS structure fits  
259 nicely into the cytoplasmic disk as expected. Finally, T2S O is an IM peptidase that processes the  
260 pseudopilins prior to their assembly. This protein has no significant domain outside the  
261 membrane and is not visible in our subtomogram average. Therefore, we did not place this  
262 protein in our architectural model.

263

## 264 **Discussion**

265

266 Here, we present the first structure of an intact T2SS *in situ*. Compared to the *MxT4aP* and the  
267 *VcT4bP* systems, the basic architecture of these molecular machines is clearly very similar (Fig.  
268 1J-L, Table 1). Since form follows function in biology, this points to overall conservation of  
269 basic function (assembling and disassembling a pilus that grows from the IM towards or through  
270 the OM) despite the presence of components without recognizable sequence homology. There  
271 are also many interesting differences, however, which lead to specific hypotheses about the roles  
272 and adaptations of many of the components (Table 1).

273

274 First, the T2SS has a much longer periplasmic vestibule (23 nm) than the T4aP and T4bP  
275 systems (15 nm). The T2SS translocates several exoproteins through the periplasmic secretin  
276 channel, whereas the T4aP and T4bP systems secrete only their pili. We speculate that the T2SS  
277 secretin evolved a large vestibule to load cargo. Consistent with this notion, in our *in situ*  
278 structure, we observed a poorly-resolved plug density near the base of the secretin vestibule,  
279 close to the N1 domain of T2S D (Supplementary Fig. 1C). T2S C is known to interact with the  
280 N0 domain of T2S D through its HR domain and recruit T2SS effectors into the complex<sup>25</sup>. The  
281 plug density could be the HR domain of T2S C<sup>25</sup> or cargo that is waiting to be extruded by the  
282 pseudopilus.

283

284 Unlike the *MxT4aP* and the *VcT4bP* systems, the *L. pneumophila* T2SS does not encode a  
285 pilotin<sup>48</sup>, consistent with the idea that pilotins are not essential for all secretin pores to assemble.  
286 It remains unclear how the *L. pneumophila* T2 D is targeted to the cell pole and how it associates  
287 with the PG. In the *MxT4aP* system, the N-terminal AMIN domains of PilQ tether the T4aP  
288 machine to the PG layer<sup>40</sup>. In our *L. pneumophila* tomograms, the PG layer is located  
289 immediately beneath the OM (Supplementary Fig. 3) but the putative PG binding domain of T2S  
290 D is N-terminal to the N0 domain, which is ~20 nm below the PG (Fig. 1M). One possibility is  
291 that the linker between the N0 domain and the putative PG binding domain bridges this gap.  
292 Curiously, the *L. pneumophila* T2SS also lacks other PG binding complexes like those present in  
293 *Vibrio spp*, *Aeromonas spp* and in *E. coli* T2SS (e.g. *gspAB* homologs)<sup>49</sup>.

294

295 Here, we found that the periplasmic domains of T2S L and M form a lower-periplasmic ring  
296 similar to those present in the *MxT4aP* and the *VcT4bP* systems. PilO and PilN (the two proteins

297 that form the lower-periplasmic ring in the *MxT4aP*), and T2S L and T2S M all begin with an N-  
298 terminal transmembrane helix, followed by a ferredoxin-like fold in the periplasm. Chang *et al.*  
299 previously hypothesized that in the *MxT4aP*, the lower-periplasmic ring likely transmits  
300 information about the status of the pilus to the cytoplasmic subcomplex<sup>40</sup>. Given that T2S L and  
301 T2S M have recently been shown to interact with secreted effectors<sup>47</sup>, T2S L and M may  
302 likewise sense cargo in the periplasm and signal the cytoplasmic complex to extend the  
303 pseudopilus. Signal sensing and transmission are likely simpler in the T2SS, however, since  
304 while the lower-periplasmic ring in the *MxT4aP* is composed of 12 or more copies of both PilO  
305 and PilN, in *L. pneumophila*, the lower-periplasmic ring is apparently comprised of only six  
306 copies each of T2S L and M. Based on these stoichiometries, the conservation of fold, and the  
307 appearances of the rings in the sub-tomogram averages, we predict that the basic structures of  
308 these lower-periplasmic rings are the same, but there are two closely-packed rings in the  
309 *MxT4aP*, as opposed to only one in the T2SS. Signaling likely involve transitions between  
310 homodimer and heterodimer associations, as the presence of cargo biases the interactions  
311 between T2S L and M towards heterodimers<sup>47</sup>, and the *VcT4bP* system, which may not signal  
312 (the pilus is never actively retracted by an ATPase), has only a single lower-periplasmic-ring  
313 protein (TcpD)<sup>39</sup>. It remains elusive how the symmetry mismatch between the secretin channel,  
314 T2S C and the lower-periplasmic ring is coordinated and what the role of symmetry mismatch is  
315 in effector loading and export.

316

317 The conservation of transmembrane helices in all the lower-periplasmic-ring proteins suggests an  
318 important role in signal transmission or structure, but the number of helices present and their  
319 connections to the cytoplasmic ring vary. Assuming there are six copies of both T2S L and M, a

320 ring of 12 transmembrane helices will be present in the IM. This contrasts with the 24 or more  
321 helices from PilN and PilO in the *MxT4aP*. Perhaps in partial compensation, the T2SS clamp  
322 protein T2S C begins with a transmembrane helix, adding 6-10 more helices to the ring  
323 (according to current estimates of stoichiometry), while its counterparts in the *MxT4aP* and  
324 *VcT4bP* systems (PilP and TcpS, respectively) are simply lipoproteins, and so add nothing. The  
325 consequence of this is not immediately clear, but it is known that T2S C's oligomerization and  
326 interaction with T2S L/M are regulated through the T2S C transmembrane helix<sup>50</sup>, and that the  
327 transmembrane regions of T2S L, M and C form a dynamic network<sup>15,50</sup>. Curiously, in the  
328 *VcT4bP* system, there are again two proteins contributing alpha helices in the IM, but in this case  
329 one is from the periplasmic ring (TcpD) and the other is from the cytoplasmic ring (TcpR). The  
330 *L. pneumophila* T2S exhibits yet another variation, in that one lower-periplasmic-ring protein  
331 (T2S L) also forms part of the cytoplasmic ring, with the transmembrane helix in between. We  
332 speculate that the fusion allows another adaptation, which is that in *L. pneumophila* the  
333 cytoplasmic domain of T2S L appears to not form a continuous ring. Being fused to the  
334 periplasmic ring may be important to hold it in place. From all this, it appears that there is an  
335 important network of 18 or more interacting transmembrane helices in the IM that mediate signal  
336 transmission between the lower-periplasmic ring and the cytoplasmic ring.

337

338 Here, we found that just as in the *MxT4aP* and the *VcT4bP* systems, the T2SS ATPase sits  
339 directly below the IM on the machine's axis. The main difference is, however, that it is  
340 positioned further away from the IM and is less well resolved. We speculate that as the T2SS  
341 rapidly switches from extending to retracting the pseudopilus (the piston model, see below), it  
342 does so by moving the ATPase up against the adaptor T2S F to extend the pseudopilus, and then

343 dropping it away from T2S F to let the pseudopilus retract. Our interpretation of the data is, then  
344 that most of our particles were in the retraction state, with the ATPase disengaged from T2S F.  
345 This mechanism is of course different than the *MxT4aP* system, which has two ATPases, one  
346 responsible for extension and the other retraction<sup>40</sup>. In the *MxT4aP* case, the two ATPases  
347 occupy the same position (they are exchanged) and were seen in contact with the adaptor in the  
348 cryotomograms, suggesting they are held there continuously for long periods of time. In contrast,  
349 the T2SS likely evolved to rapidly switch between short bursts of extension and retraction, and  
350 so it does not release its ATPase completely – it appears to merely “clutch” it on and off. In the  
351 retraction state, we propose that the N1E domain is close to the IM and interacts with the  
352 cytoplasmic domains of T2S L and T2S F<sup>24,51–53</sup>, while the N2E and CTE domains dangle on  
353 flexible linkers, causing them to resolve poorly in our average.

354  
355 Several individual particles exhibit putative pseudopili that extend from the IM to the base of the  
356 T2S D channel. No pseudopilus was seen to extend up to the gate, suggesting either the  
357 pseudopilus only pushes exo-proteins into the periplasmic vestibule or an extended form of a  
358 pseudopilus (reaching up to the gate or beyond) is short-lived. Our model showed that only ~5  
359 copies of the major pseudopilin T2S G and one copy of each of the minor pseudopilins (T2S I, J,  
360 K, H) is sufficient to span the distance between the IM and the base of the secretin. We also  
361 found that ~12-15 copies of the major pseudopilin and one copy of each of the minor  
362 pseudopilins T2S I, J, K, H would be required for the pseudopilus to extend to the secretin gate.  
363 It is not clear how the length of the pseudopilus is controlled. Intriguingly, the C-terminal  
364 domain of T2S L has sequence similarity (Phyre: 52 amino acids, 68% confidence and 15%



365 identity) to the C-terminal domain of FliK that controls flagellar hook length<sup>54</sup>. Thus, T2S L may  
366 have multiple functions.

367

368 The piston model for substrate extrusion posits that the T2SS iteratively extends and retracts a  
369 short but permanent pseudopilus, pushing cargo out of the cell<sup>55</sup>. An alternative model is that the  
370 pseudopilus completely disassembles after cargo release, and a completely new pseudopilus  
371 assembles in the next round<sup>17</sup>. Concerning these possibilities, we note that the stem density  
372 positioned right in the middle of the lower-periplasmic ring likely represents the minor  
373 pseudopilin complex. Because this stem density is clear in the sub-tomogram average, it means it  
374 is usually present. Second, the cytoplasmic disk is the ATPase, revealing that it too is usually  
375 present. Both points support the piston model.

376 Overall, our *in situ* structure of the *L. pneumophila* T2SS highlights commonalities and key  
377 differences between the evolutionarily-related T2SS, T4aP and T4bP machines and provides new  
378 insights into its structure and function.

379

380

381

## 382 **Materials and Methods**

383

### 384 **Strains, growth conditions, and mutant generation**

385 All experiments were performed using the *L. pneumophila* Lp02 strain (thyA hsdR rpsL), a  
386 derivative of the clinical isolate *L. pneumophila* Philadelphia-1. Cells were grown as described  
387 previously<sup>57,58</sup>. Briefly, cells were grown in ACES buffered yeast extract (AYE) broth or on  
388 buffered charcoal yeast extract (CYE) plates. The culture media were always supplemented with  
389 thymidine (100 µg/ml), ferric nitrate and cysteine hydrochloride.

390 A T4SS mutant of Lp02 that lacks all 26 of the *dot/icm* genes (i.e., JV4044) was previously  
391 described<sup>59,60</sup>, as was a mutant of Lp02 that lacks *dotH*, *dotG*, and *dotF* (i.e., JV7058)<sup>60</sup>. To  
392 generate a *lspDE* mutant lacking the T2SS (i.e., strain NU438) and a *pilQ* mutant lacking T4P  
393 (i.e., strain NU439) of *L. pneumophila*, previously reported plasmids were introduced into Lp02  
394 by natural transformation and then the desired mutations were introduced into the bacterial  
395 chromosome via allelic exchange<sup>32</sup>. Plasmid pOE4Kan was used to make the *lspDE* mutant, and  
396 pGQ::Gm was employed for making the *pilQ* mutant<sup>61,62</sup>. In a similar way, a *lspDE pilQ* double  
397 mutant lacking both T4SS and T4P (i.e., strain NU440) was constructed by introducing  
398 pGQ::Gm into strain NU438.

399

### 400 **Assay for secreted proteins**

401 *L. pneumophila* strains were grown in AYE broth at 37°C to either the mid-log or late-log phase  
402 of growth, at which times the cultures were centrifuged and the resultant supernatants obtained  
403 and filtered through 0.2 µm syringe filters. Five µl of the supernatant samples were subjected to  
404 SDS-PAGE and then analyzed by immunoblot as previously described<sup>37</sup>. Briefly, after blocking

405 in 5% milk for 1 h, the blots were incubated overnight with 1:1,000 dilutions of rabbit anti-CelA,  
406 anti-ProA, or anti-LegP antibodies, washed, and then incubated for 1 h with 1:1,000 dilution of  
407 secondary HRP-conjugated goat anti-rabbit IgG antibody (Cell Signaling Technology). Images  
408 of the immunoblots were developed with ECL<sup>TM</sup> Western Blotting Detection Reagent (GE  
409 Healthcare).

410

#### 411 **Sample preparation for electron cryotomography**

412 *L. pneumophila* Lp02 cells were grown till early stationary stage ( $OD_{600} \sim 2.8$ ) and harvested.  
413 Cells were mixed with 10-nm colloidal gold beads (Sigma-Aldrich, St. Louis, MO) precoated  
414 with bovine serum albumin. Four  $\mu$ l of this mixture was applied onto freshly glow-discharged  
415 copper R2/2 of th0 Quantifoil holey carbon grids (Quantifoil Micro Tools GmbH, Jena,  
416 Germany). Using an FEI Vitrobot Mark IV, grids were then blotted (under 100% humidity  
417 conditions) and plunge-frozen in a liquid ethane/propane mixture.

418

#### 419 **Electron tomography and subtomogram averaging**

420 The frozen grids were subsequently imaged in an FEI Polara 300 keV FEG transmission  
421 electron microscope (Thermo Fisher Scientific) coupled with a Gatan energy filter and a Gatan  
422 K2 Summit direct electron detector. Energy-filtered tilt series of cells were collected  
423 automatically from  $-60^\circ$  to  $+60^\circ$  at  $1.5^\circ$  intervals using the UCSF Tomography data collection  
424 software<sup>63</sup> with a cumulative total dosage of  $100 \text{ e}^- \text{ \AA}^{-2}$ , a defocus of  $-6 \mu\text{m}$  and a pixel size of  
425  $3.9 \text{ \AA}$ . Using the IMOD software package<sup>64</sup>, the images were then binned by 2, aligned and  
426 contrast transfer function corrected. Subsequently, SIRT reconstructions were produced using the  
427 TOMO3D program<sup>65</sup>. T2SS structures on cell envelopes were visually identified by their

428 characteristic “hour-glass” like shape. Subtomogram averages of the *L. pneumophila* T2SS were  
429 generated by the PEET program<sup>66</sup>. The T2SS subtomogram averages exhibited a gross twofold  
430 symmetry around the central midline in the periplasm. Based on this observation, we applied a  
431 two-fold symmetry on the periplasmic complex. No symmetry was applied on the cytoplasmic  
432 complex. The T2SS exhibited a substantial flexibility between the OM- and IM-associated parts;  
433 binary masks were applied to perform focused alignments on the OM and on the IM complexes  
434 separately and finally combined to generate a composite structure. The numbers of tomograms  
435 collected and number of particles used are summarized in Supplementary Table 1.

436

#### 437 **Identifying homologues between the *L. pneumophila* T2SS and the T4P system**

438 *L. pneumophila* Lp02 strain T2SS protein sequences were selected from the NCBI and UniProt  
439 databases. To identify corresponding components between the *L. pneumophila* T2SS and the  
440 *MxT4aP* and *VcT4bP* systems, we utilized two different programs: Phyre and Blast search<sup>41,67</sup>.  
441 This confirmed *L. pneumophila* T2SS components T2S C, D, E, F, G and M are homologues of  
442 the T4aP components PilP, PilQ, PilB, PilC, PilA and PilO respectively. Using a combination of  
443 Phyre, MOTIF-search, and Blast programs, we also predicted distinct domains and motifs within  
444 different T2SS components.

445

446

447

448

449

450 **Data availability**

451 The subtomogram average of the *L. pneumophila* T2SS has been deposited in the Electron  
452 Microscopy Data Bank under the following accession codes: XXXX (wild-type aligned on the  
453 OM part); EMD-XXX (wild-type, aligned on the IM part)

454

455

456

457 **Acknowledgements:**

458 This work was supported by NIH grants AI127401 to G.J.J. and AI043987 to N.P.C. ECT data  
459 were recorded at the Beckman Institute Resource Center for Transmission Electron Microscopy at  
460 Caltech and the cryo-EM facility at Janelia Research Campus. We thank Dr. Davi Ortega for  
461 helpful discussions. M. K. is supported by a postdoctoral Rubicon fellowship from De  
462 Nederlandse Organisatie voor Wetenschappelijk Onderzoek (NWO).

463

464

465

466

467

## 468   **References**

- 469   1. Costa, T. R. D. *et al.* Secretion systems in Gram-negative bacteria: structural and  
470       mechanistic insights. *Nat. Rev. Microbiol.* **13**, 343–359 (2015).
- 471   2. Abby, S. S. *et al.* Identification of protein secretion systems in bacterial genomes. *Sci. Rep.*  
472       **6**, 23080 (2016).
- 473   3. Hospenthal, M. K., Costa, T. R. D. & Waksman, G. A comprehensive guide to pilus  
474       biogenesis in Gram-negative bacteria. *Nat. Rev. Microbiol.* **15**, 365–379 (2017).
- 475   4. Peabody, C. R. *et al.* Type II protein secretion and its relationship to bacterial type IV pili  
476       and archaeal flagella. *Microbiology (Reading, Engl.)* **149**, 3051–3072 (2003).
- 477   5. Cianciotto, N. P. Type II secretion: a protein secretion system for all seasons. *Trends*  
478       *Microbiol.* **13**, 581–588 (2005).
- 479   6. Cianciotto, N. P. & White, R. C. Expanding Role of Type II Secretion in Bacterial  
480       Pathogenesis and Beyond. *Infect. Immun.* **85**, e00014-17, (2017).
- 481   7. DuMont, A. L. & Cianciotto, N. P. *Stenotrophomonas maltophilia* Serine Protease StmPr1  
482       Induces Matrilysis, Anoikis, and Protease-Activated Receptor 2 Activation in Human Lung  
483       Epithelial Cells. *Infect. Immun.* **85**, (2017).
- 484   8. do Vale, A., Pereira, C., Osorio, C. R. & dos Santos, N. M. S. The Apoptogenic Toxin AIP56  
485       Is Secreted by the Type II Secretion System of *Photobacterium damsela* subsp. *piscicida*.  
486       *Toxins (Basel)* **9**, (2017).
- 487   9. Andersson, J. A. *et al.* Identification of New Virulence Factors and Vaccine Candidates for  
488       *Yersinia pestis*. *Front. Cell. Infect. Microbiol.* **7**, 448 (2017).
- 489   10. Jang, K. K. *et al.* Identification and characterization of *Vibrio vulnificus* plpA encoding a  
490       phospholipase A2 essential for pathogenesis. *J. Biol. Chem.* **292**, 17129–17143 (2017).

- 491 11. Wang, X., Han, Q., Chen, G., Zhang, W. & Liu, W. A putative type II secretion system is  
492 involved in cellulose utilization in *Cytophaga hutchisonii*. *Front. Microbiol.* **8**, 1482 (2017).
- 493 12. Waack, U. *et al.* Targeting the Type II Secretion System: Development, Optimization, and  
494 Validation of a High-Throughput Screen for the Identification of Small Molecule Inhibitors.  
495 *Front. Cell. Infect. Microbiol.* **7**, 380 (2017).
- 496 13. Thomassin, J.-L., Santos Moreno, J., Guilvout, I., Tran Van Nhieu, G. & Francetic, O. The  
497 trans-envelope architecture and function of the type 2 secretion system: new insights raising  
498 new questions. *Mol. Microbiol.* **105**, 211–226 (2017).
- 499 14. Filloux, A. & Voulhoux, R. Multiple Structures Disclose the Secretins' Secrets. *J. Bacteriol.*  
500 **200**, p. 914 (2018).
- 501 15. Nivaskumar, M. & Francetic, O. Type II secretion system: A magic beanstalk or a protein  
502 escalator. *Biochimica et Biophysica Acta (BBA) - Molecular Cell Research* **1843**, 1568–1577  
503 (2014).
- 504 16. Nunn, D. Bacterial type II protein export and pilus biogenesis: more than just homologies?  
505 *Trends Cell Biol.* **9**, 402–408 (1999).
- 506 17. López-Castilla, A. *et al.* Structure of the calcium-dependent type 2 secretion pseudopilus.  
507 *Nat. Microbiol.* **2**, 1686–1695 (2017).
- 508 18. Yan, Z., Yin, M., Xu, D., Zhu, Y. & Li, X. Structural insights into the secretin translocation  
509 channel in the type II secretion system. *Nat. Struct. Mol. Biol.* **24**, 177–183 (2017).
- 510 19. Hay, I. D., Belousoff, M. J., Dunstan, R. A., Bamert, R. S. & Lithgow, T. Structure and  
511 Membrane Topography of the *Vibrio*-Type Secretin Complex from the Type 2 Secretion  
512 System of Enteropathogenic *Escherichia coli*. *Journal of Bacteriology* **200**, (2017).

- 513 20. Yin, M., Yan, Z. & Li, X. Structural insight into the assembly of the type II secretion system  
514 pilotin-secretin complex from enterotoxigenic *Escherichia coli*. *Nat. Microbiol.* **3**, 581–587  
515 (2018).
- 516 21. Chernyatina, A. A. & Low, H. H. Architecture of a bacterial type II secretion system.  
517 *bioRxiv* (2018). doi:10.1101/397794
- 518 22. Hay, I. D., Belousoff, M. J. & Lithgow, T. Structural Basis of Type 2 Secretion System  
519 Engagement between the Inner and Outer Bacterial Membranes. *MBio* **8**, (2017).
- 520 23. Yamagata, A. & Tainer, J. A. Hexameric structures of the archaeal secretion ATPase GspE  
521 and implications for a universal secretion mechanism. *EMBO J.* **26**, 878–890 (2007).
- 522 24. Lu, C. *et al.* Hexamers of the type II secretion ATPase GspE from *Vibrio cholerae* with  
523 increased ATPase activity. *Structure* **21**, 1707–1717 (2013).
- 524 25. Korotkov, K. V. *et al.* Structural and functional studies on the interaction of GspC and GspD  
525 in the type II secretion system. *PLoS Pathog.* **7**, e1002228 (2011).
- 526 26. Korotkov, K. V. & Hol, W. G. J. Structure of the GspK-GspI-GspJ complex from the  
527 enterotoxigenic *Escherichia coli* type 2 secretion system. *Nat. Struct. Mol. Biol.* **15**, 462–468  
528 (2008).
- 529 27. López-Castilla, A. *et al.* Structure of the calcium-dependent type 2 secretion pseudopilus.  
530 *Nat. Microbiol.* **2**, 1686–1695 (2017).
- 531 28. Abendroth, J., Rice, A. E., McLuskey, K., Bagdasarian, M. & Hol, W. G. J. The crystal  
532 structure of the periplasmic domain of the type II secretion system protein EpsM from *Vibrio*  
533 *cholerae*: the simplest version of the ferredoxin fold. *J. Mol. Biol.* **338**, 585–596 (2004).



- 534 29. Abendroth, J., Kreger, A. C. & Hol, W. G. J. The dimer formed by the periplasmic domain of  
535 EpsL from the Type 2 Secretion System of *Vibrio parahaemolyticus*. *J. Struct. Biol.* **168**,  
536 313–322 (2009).
- 537 30. Oikonomou, C. M., Chang, Y.-W. & Jensen, G. J. A new view into prokaryotic cell biology  
538 from electron cryotomography. *Nat. Rev. Microbiol.* **14**, 205–220 (2016).
- 539 31. DebRoy, S., Dao, J., Söderberg, M., Rossier, O. & Cianciotto, N. P. *Legionella pneumophila*  
540 type II secretome reveals unique exoproteins and a chitinase that promotes bacterial  
541 persistence in the lung. *Proc. Natl. Acad. Sci. U.S.A.* **103**, 19146–19151 (2006).
- 542 32. White, R. C. *et al.* Type II Secretion-Dependent Aminopeptidase LapA and Acyltransferase  
543 PlaC Are Redundant for Nutrient Acquisition during *Legionella pneumophila* Intracellular  
544 Infection of Amoebas. *MBio* **9**, (2018).
- 545 33. Rossier, O., Dao, J. & Cianciotto, N. P. The type II secretion system of *Legionella*  
546 *pneumophila* elaborates two aminopeptidases, as well as a metalloprotease that contributes to  
547 differential infection among protozoan hosts. *Appl. Environ. Microbiol.* **74**, 753–761 (2008).
- 548 34. Stewart, C. R., Burnside, D. M. & Cianciotto, N. P. The surfactant of *Legionella*  
549 *pneumophila* is secreted in a TolC-dependent manner and is antagonistic toward other  
550 *Legionella* species. *J. Bacteriol.* **193**, 5971–5984 (2011).
- 551 35. Tyson, J. Y., Vargas, P. & Cianciotto, N. P. The novel *Legionella pneumophila* type II  
552 secretion substrate NttC contributes to infection of amoebae *Hartmannella vermiformis* and  
553 *Willaertia magna*. *Microbiology (Reading, Engl.)* **160**, 2732–2744 (2014).
- 554 36. Mallama, C. A., McCoy-Simandle, K. & Cianciotto, N. P. The Type II Secretion System of  
555 *Legionella pneumophila* Dampens the MyD88 and Toll-Like Receptor 2 Signaling Pathway  
556 in Infected Human Macrophages. *Infect. Immun.* **85**, (2017).

- 557 37. Truchan, H. K., Christman, H. D., White, R. C., Rutledge, N. S. & Cianciotto, N. P. Type II  
558 Secretion Substrates of *Legionella pneumophila* Translocate Out of the Pathogen-Occupied  
559 Vacuole via a Semipermeable Membrane. *MBio* **8**, (2017).
- 560 38. Liles, M. R., Viswanathan, V. K. & Cianciotto, N. P. Identification and temperature  
561 regulation of *Legionella pneumophila* genes involved in type IV pilus biogenesis and type II  
562 protein secretion. *Infect. Immun.* **66**, 1776–1782 (1998).
- 563 39. Chang, Y.-W. *et al.* Architecture of the *Vibrio cholerae* toxin-coregulated pilus machine  
564 revealed by electron cryotomography. *Nat. Microbiol.* **2**, 16269 (2017).
- 565 40. Chang, Y.-W. *et al.* Architecture of the type IVa pilus machine. *Science* **351**, aad2001  
566 (2016).
- 567 41. Kelley, L. A., Mezulis, S., Yates, C. M., Wass, M. N. & Sternberg, M. J. E. The Phyre2 web  
568 portal for protein modeling, prediction and analysis. *Nat. Protoc.* **10**, 845–858 (2015).
- 569 42. Adebali, O., Ortega, D. R. & Zhulin, I. B. CDvist: a webserver for identification and  
570 visualization of conserved domains in protein sequences. *Bioinformatics* **31**, 1475–1477  
571 (2015).
- 572 43. D’Imprima, E. *et al.* Cryo-EM structure of the bifunctional secretin complex of *Thermus*  
573 *thermophilus*. *Elife* **6**, (2017).
- 574 44. Cisneros, D. A., Bond, P. J., Pugsley, A. P., Campos, M. & Francetic, O. Minor pseudopilin  
575 self-assembly primes type II secretion pseudopilus elongation: Role of minor pseudopilins in  
576 type II secretion. *The EMBO Journal* **31**, 1041–1053 (2012).
- 577 45. Korotkov, K. V., Sandkvist, M. & Hol, W. G. J. The type II secretion system: biogenesis,  
578 molecular architecture and mechanism. *Nat. Rev. Microbiol.* **10**, 336–351 (2012).

- 579 46. Schneidman-Duhovny, D., Inbar, Y., Nussinov, R. & Wolfson, H. J. PatchDock and  
580 SymmDock: servers for rigid and symmetric docking. *Nucleic Acids Res.* **33**, W363-367  
581 (2005).
- 582 47. Michel-Souzy, S. *et al.* Direct interactions between the secreted effector and the T2SS  
583 components GspL and GspM reveal a new effector-sensing step during type 2 secretion. *J.*  
584 *Biol. Chem.* **293**, 19441–19450 (2018).
- 585 48. Gu, S., Shevchik, V. E., Shaw, R., Pickersgill, R. W. & Garnett, J. A. The role of intrinsic  
586 disorder and dynamics in the assembly and function of the type II secretion system. *Biochim*  
587 *Biophys Acta Proteins Proteom* **1865**, 1255–1266 (2017).
- 588 49. Strozen, T. G. *et al.* Involvement of the GspAB complex in assembly of the type II secretion  
589 system secretin of *Aeromonas* and *Vibrio* species. *J. Bacteriol.* **193**, 2322–2331 (2011).
- 590 50. Lallemand, M. *et al.* Dynamic interplay between the periplasmic and transmembrane  
591 domains of GspL and GspM in the type II secretion system. *PLoS ONE* **8**, e79562 (2013).
- 592 51. Abendroth, J., Murphy, P., Sandkvist, M., Bagdasarian, M. & Hol, W. G. J. The X-ray  
593 structure of the type II secretion system complex formed by the N-terminal domain of EpsE  
594 and the cytoplasmic domain of EpsL of *Vibrio cholerae*. *J. Mol. Biol.* **348**, 845–855 (2005).
- 595 52. Py, B., Loiseau, L. & Barras, F. An inner membrane platform in the type II secretion  
596 machinery of Gram-negative bacteria. *EMBO Rep.* **2**, 244–248 (2001).
- 597 53. Arts, J. *et al.* Interaction domains in the *Pseudomonas aeruginosa* type II secretory apparatus  
598 component XcpS (GspF). *Microbiology (Reading, Engl.)* **153**, 1582–1592 (2007).
- 599 54. Waters, R. C., O’Toole, P. W. & Ryan, K. A. The FliK protein and flagellar hook-length  
600 control. *Protein Sci.* **16**, 769–780 (2007).

- 601 55. Douzi, B., Ball, G., Cambillau, C., Tegoni, M. & Voulhoux, R. Deciphering the Xcp  
602 *Pseudomonas aeruginosa* type II secretion machinery through multiple interactions with  
603 substrates. *J. Biol. Chem.* **286**, 40792–40801 (2011).
- 604 56. Kucukelbir, A., Sigworth, F. J. & Tagare, H. D. Quantifying the local resolution of cryo-EM  
605 density maps. *Nat. Methods* **11**, 63–65 (2014).
- 606 57. Jeong, K. C., Ghosal, D., Chang, Y.-W., Jensen, G. J. & Vogel, J. P. Polar delivery of  
607 *Legionella* type IV secretion system substrates is essential for virulence. *Proc. Natl. Acad.*  
608 *Sci. U.S.A.* **114**, 8077–8082 (2017).
- 609 58. Ghosal, D., Chang, Y.-W., Jeong, K. C., Vogel, J. P. & Jensen, G. Molecular architecture of  
610 the *Legionella* Dot/Icm type IV secretion system. (2018). doi:10.1101/312009
- 611 59. Ghosal, D., Chang, Y.-W., Jeong, K. C., Vogel, J. P. & Jensen, G. J. In situ structure of the  
612 *Legionella* Dot/Icm type IV secretion system by electron cryotomography. *EMBO Rep.* **18**,  
613 726–732 (2017).
- 614 60. Vincent, C. D. *et al.* Identification of the core transmembrane complex of the *Legionella*  
615 Dot/Icm type IV secretion system. *Mol. Microbiol.* **62**, 1278–1291 (2006).
- 616 61. Rossier, O., Starkenburg, S. R. & Cianciotto, N. P. *Legionella pneumophila* type II protein  
617 secretion promotes virulence in the A/J mouse model of Legionnaires' disease pneumonia.  
618 *Infect. Immun.* **72**, 310–321 (2004).
- 619 62. Rossier, O. & Cianciotto, N. P. Type II protein secretion is a subset of the PilD-dependent  
620 processes that facilitate intracellular infection by *Legionella pneumophila*. *Infect. Immun.* **69**,  
621 2092–2098 (2001).

- 622 63. Zheng, S. Q. *et al.* UCSF tomography: an integrated software suite for real-time electron  
623 microscopic tomographic data collection, alignment, and reconstruction. *J. Struct. Biol.* **157**,  
624 138–147 (2007).
- 625 64. Kremer, J. R., Mastronarde, D. N. & McIntosh, J. R. Computer visualization of three-  
626 dimensional image data using IMOD. *J. Struct. Biol.* **116**, 71–76 (1996).
- 627 65. Agulleiro, J.-I. & Fernandez, J.-J. Tomo3D 2.0--exploitation of advanced vector extensions  
628 (AVX) for 3D reconstruction. *J. Struct. Biol.* **189**, 147–152 (2015).
- 629 66. Nicastro, D. *et al.* The molecular architecture of axonemes revealed by cryoelectron  
630 tomography. *Science* **313**, 944–948 (2006).
- 631 67. Altschul, S. F. *et al.* Gapped BLAST and PSI-BLAST: a new generation of protein database  
632 search programs. *Nucleic Acids Res.* **25**, 3389–3402 (1997).
- 633

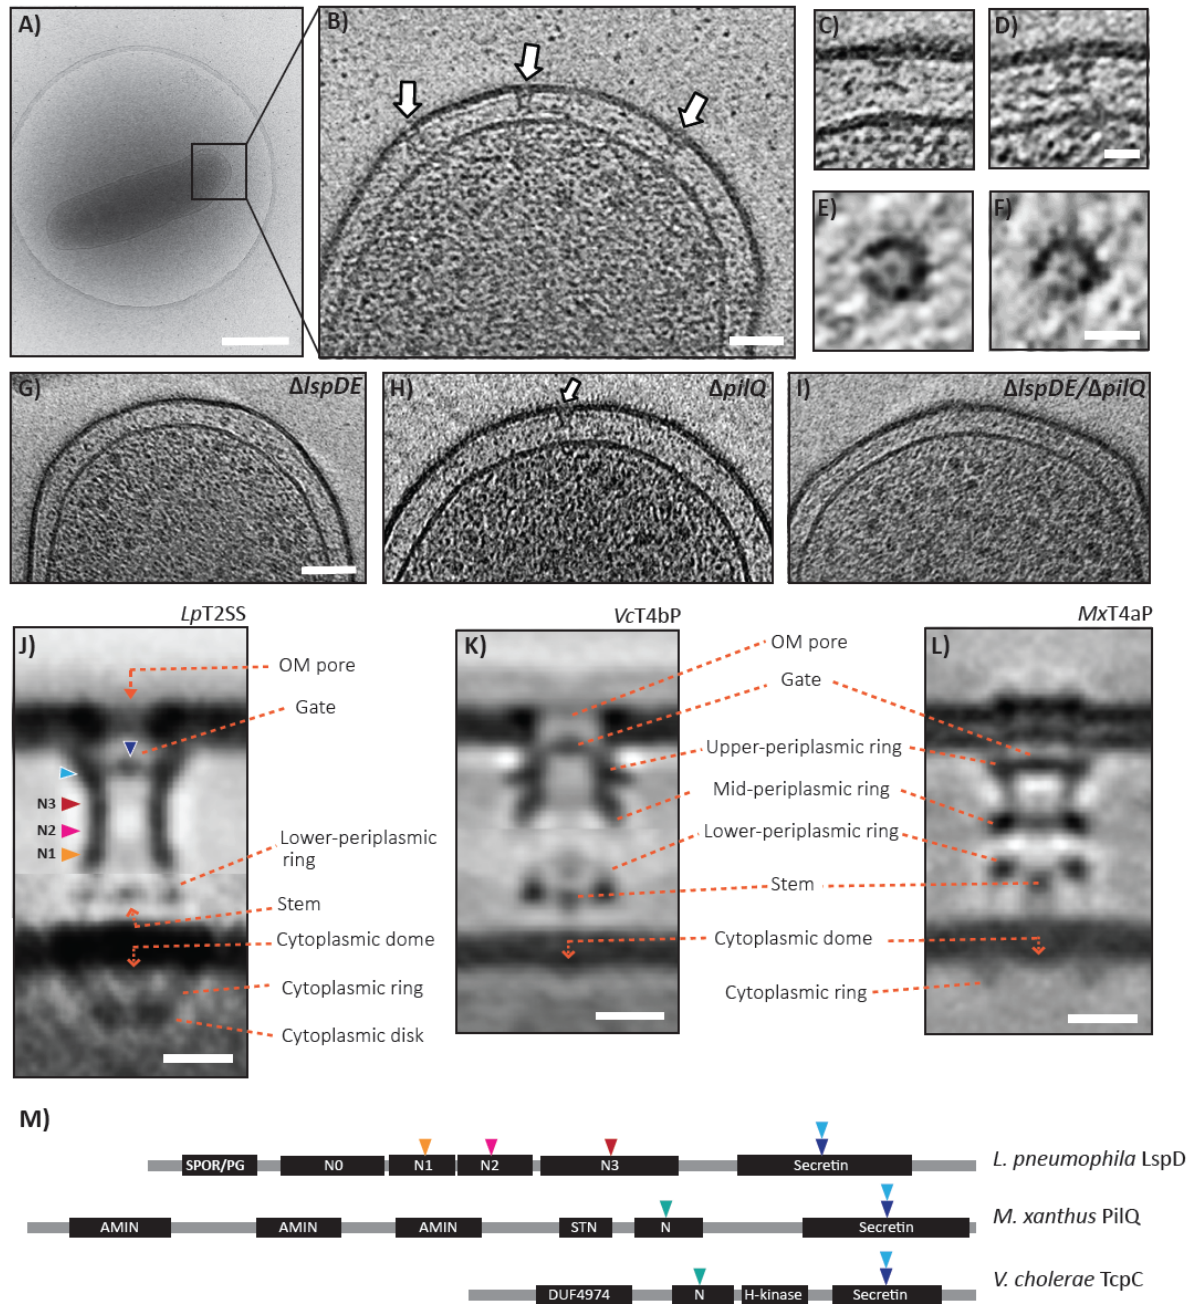

**Fig. 1. Visualization of the type II secretion system (T2SS) in frozen-hydrated *L. pneumophila* cells.**

(A) Cryo-EM image of a frozen-hydrated *L. pneumophila* cell on a Quantifoil grid. (B) Central slice through a tomographic reconstruction of a *L. pneumophila* cell pole. White arrows point to “hour-glass” shaped putative T2SS structures. (C and D) Tomographic slices showing individual T2SS particles. (E

and F) Top views of individual T2SS particles. (G-I) Tomographic slices of *L. pneumophila* mutants lacking the T2SS secretin (G), the type IVa pili secretin (H), or both (I). (J) Composite subtomogram average of the wild-type *L. pneumophila* T2SS. (K-L) Subtomogram averages of the *Vibrio cholerae* T4bP and *Myxococcus xanthus* T4aP<sup>39,40</sup> for comparison. (M) Domain architectures of the secretin protein in the *L. pneumophila* T2SS (T2S D or LspD), *M. xanthus* T4aP (PilQ) and *V. cholerae* T4bP (TcpC). Protein regions corresponding to different densities are indicated by arrowheads. PG: Peptidoglycan binding domain, SPOR: Sporulation related repeat, STN: Secretin and TonB N terminus short domain. Scale bars, 500 nm (A), 50 nm (B), 20 nm (C, D), 10 nm (E, F), 50 nm (G-I), 10 nm (J-L).

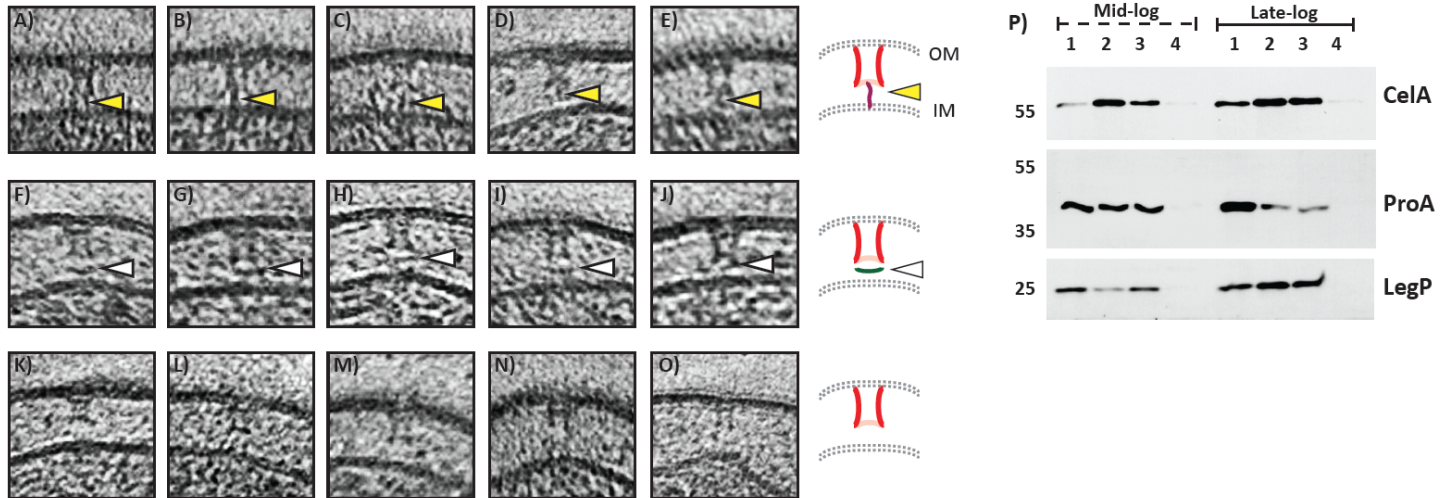

**Fig. 2. Individual T2SS subcomplexes.** Tomographic slices showing individual T2SS particles with: (A-E) pseudopili (yellow arrowheads), (F-J) lower-periplasmic rings (white arrowheads) and (K-O) only secretin channels. Schematic representations (right). (P) Western blot analyses of T2SS-effectors (CelA, ProA and LegP) present in *L. pneumophila* culture supernatants at mid- and late-log phases. Different strains were analyzed: lane-1) WT *L. pneumophila* (Lp02), and control strains lacking 2) all the components of the *L. pneumophila* Dot/Icm T4BSS (JV4044), 3) a functional Dot/Icm T4BSS ( $\Delta dotH$ ,  $\Delta dotG$ , and  $\Delta dotF$ : JV7058) and 4) a functional T2SS ( $\Delta lspDE$ ). In several rounds of experiments, we did not notice any consistent increase in T2SS effector release in Dot/Icm T4SS nonfunctional mutants. Shown here are representative western blots.



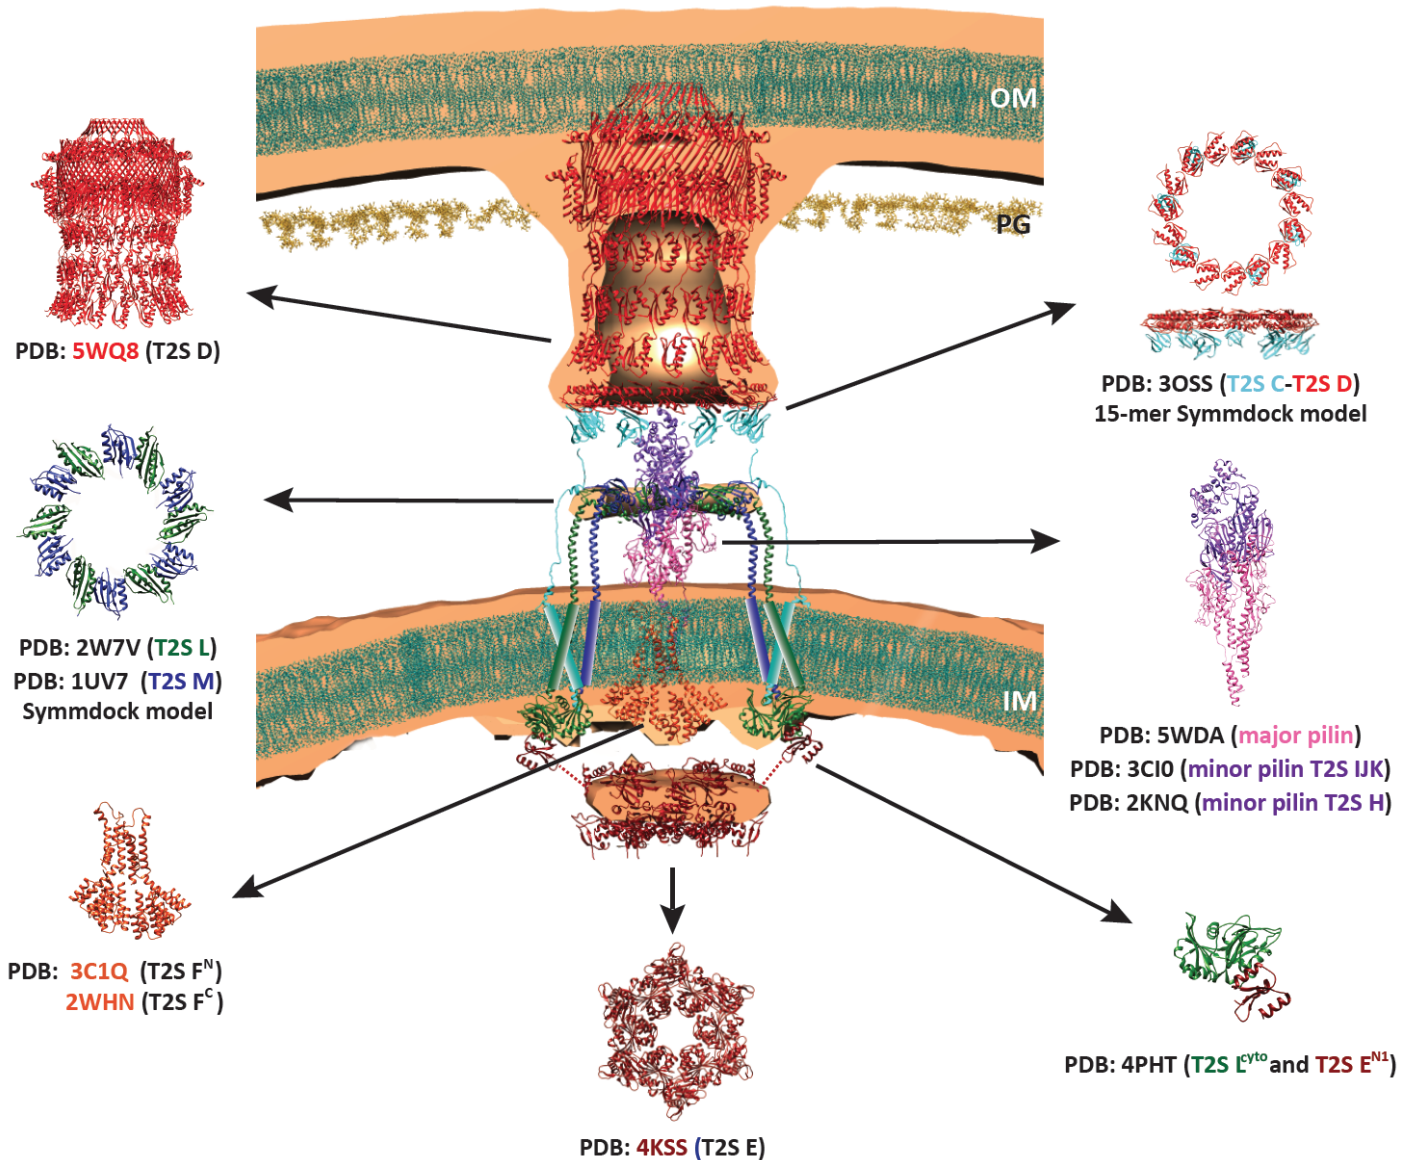

**Fig. 3. Architectural model of the T2SS.** Atomic models of T2SS-components are superimposed on the central slice of the T2SS subtomogram average based on known connectivities and interfaces (see text). Transmembrane domains of the IM proteins are shown as cylinders. Linkers between N1E domain and N2E/CTE domains of T2S E are represented by dotted lines. OM = outer membrane, IM = inner membrane, PG = peptidoglycan. Lipids are shown in dark cyan and peptidoglycan dark yellow.

**Table 1:** Comparison between the T2SS and related molecular machines T4aP and T4bP systems.

| General description                    |                                 | <i>Ip_T2SS</i>                             | <i>Mx_T4aP</i>                                                                                                                                                                                                                                                                                                                                                                               | <i>Vc_T4bP</i>                                                                                                                                                                                                                                                                                                                                                                                                                                                                                                                                                                                                                                                                                                                                                                                                                                                                                                                                                                                      | Comments |
|----------------------------------------|---------------------------------|--------------------------------------------|----------------------------------------------------------------------------------------------------------------------------------------------------------------------------------------------------------------------------------------------------------------------------------------------------------------------------------------------------------------------------------------------|-----------------------------------------------------------------------------------------------------------------------------------------------------------------------------------------------------------------------------------------------------------------------------------------------------------------------------------------------------------------------------------------------------------------------------------------------------------------------------------------------------------------------------------------------------------------------------------------------------------------------------------------------------------------------------------------------------------------------------------------------------------------------------------------------------------------------------------------------------------------------------------------------------------------------------------------------------------------------------------------------------|----------|
| Secretin                               | LspD                            | PilQ                                       | TcpC                                                                                                                                                                                                                                                                                                                                                                                         | Secretin forms a periplasmic vestibule and OM pore. The T2SS vestibule is much longer than the T4aP/T4bP vestibule due to its multiple N-domains and lacks a distinct upper ring. A longer secretin channel in the T2SS may facilitate effector loading and translocation.                                                                                                                                                                                                                                                                                                                                                                                                                                                                                                                                                                                                                                                                                                                          |          |
| Pilotin                                | TsaP                            | TcpQ                                       | Pilots assist in the assembly and stabilization of the secretin channel. TsaP binds to peptidoglycan and perhaps provides additional stability to the secretin. TcpQ is required for localization and stability of its secretin. <i>Legionella</i> T2SS has no pilotin. Also, LspD has no obvious membrane targeting sequence. How the Lpt2SS targets to and assembles at the OM is unclear. |                                                                                                                                                                                                                                                                                                                                                                                                                                                                                                                                                                                                                                                                                                                                                                                                                                                                                                                                                                                                     |          |
| Clamp-protein                          | LspC                            | PilP                                       | TcpS                                                                                                                                                                                                                                                                                                                                                                                         | The so-called "clamp-protein" connects the OM complex to the lower-periplasmic ring and the IM. PilP, TcpS and LspC are homologs and homologous regions interact with the base of the secretin. Only T2SS clamp proteins (e.g. LspC, GspC) have a transmembrane helix and a small cytoplasmic domain; PilP and TcpS are IM-associated lipoproteins. LspC's transmembrane helix may be important to add helices to the IM alpha-helix complex, perhaps to stabilize the structure or signaling mechanisms.                                                                                                                                                                                                                                                                                                                                                                                                                                                                                           |          |
| Lower-periplasmic ring                 | LspL's periplasmic domain, LspM | PilN, PilO                                 | TcpD                                                                                                                                                                                                                                                                                                                                                                                         | The lower-periplasmic ring likely (i) supports the assembly, stability, and position of the pilus stem, (ii) senses conditions on the pilus surface or tip, and (iii) regulates the cytoplasmic ATPase complex through its transmembrane helices. LspL, LspM, PilN, and PilO (but not TcpD) share the ferroxidase-like fold, and form both homo- and hetero-dimers. In the T4aP system, 12 or more periplasmic domains of both PilN and PilO form what is likely two close-packed rings. In the T2SS, 6 LspL and 6 LspM periplasmic domains form what appears to be one ring. Cargo binding promotes formation of heterodimers, so the interplay between homo- and hetero-dimers may be involved in signaling, as in the T4aP system. In T4bP, TcpD alone forms the lower periplasmic ring, and it may not have a signaling function, since T4bP pili are not actively retracted. All these lower-periplasmic-ring proteins have transmembrane helices, which together form another ring in the IM. |          |
| ATPase docking ring (Cytoplasmic ring) | LspL's cytoplasmic domain       | PilM                                       | TcpR                                                                                                                                                                                                                                                                                                                                                                                         | The ATPase docking ring recruits the ATPase complex to the adapter. The cytoplasmic domain of LspL is homologous to PilM, so LspL is a fusion of the T4aP proteins PilM and PilN. The LspL ring is not continuous, as there are apparently only 6 monomers. In the T2SS, the ATPase docking ring appears to "clutch" the ATPase on and off for rapid cycles of growth and retraction. In the T4aP, the ATPase docking ring appears to select between growth and retraction ATPases, and hold either one stably in place.                                                                                                                                                                                                                                                                                                                                                                                                                                                                            |          |
| Adapter complex                        | LspF                            | PilC                                       | TcpE                                                                                                                                                                                                                                                                                                                                                                                         | Recruits pilin/pseudopilin subunits during pilus/pseudopilus growth. Mediates energy transfer from the ATPase complex to the pilus/pseudopilus, likely through an Archimedian-screw-like rotation.                                                                                                                                                                                                                                                                                                                                                                                                                                                                                                                                                                                                                                                                                                                                                                                                  |          |
| Major pilin                            | LspG                            | PilA                                       | TcpA                                                                                                                                                                                                                                                                                                                                                                                         | Major subunit for the pilus /pseudopilus structure.                                                                                                                                                                                                                                                                                                                                                                                                                                                                                                                                                                                                                                                                                                                                                                                                                                                                                                                                                 |          |
| Minor pilins                           | LspJ/K/H                        | PilV (1-3), PilW (1-3), FimU (1-3), PilX/L | TcpB                                                                                                                                                                                                                                                                                                                                                                                         | Minor-pseudopilins assemble into a stable complex that interacts with the lower periplasmic ring. The T2SS has four minor pilins, the T4aP has three different and independent sets of four, and the T4bP system has only one.                                                                                                                                                                                                                                                                                                                                                                                                                                                                                                                                                                                                                                                                                                                                                                      |          |
| ATPase complex (Cytoplasmic disk)      | LspE                            | PilB, PilT                                 | TcpT                                                                                                                                                                                                                                                                                                                                                                                         | The ATPase powers pilus growth and sometimes retraction (in the T4aP system), likely by rotating the adapter. The T2SS ATPase LspE has three distinct domains (N1E, N2E and CTE) connected by two flexible linkers; the T4a/bP assembly ATPases PilB/TcpT lack any N1E domain. The T4aP system has a retraction ATPase (PilT) but T2SS and T4bP systems have none.                                                                                                                                                                                                                                                                                                                                                                                                                                                                                                                                                                                                                                  |          |
| Prepilin peptidase                     | LspO                            | PilD                                       | TcpJ                                                                                                                                                                                                                                                                                                                                                                                         | Cleaves the leader sequences from prepilin and facilitates pilus/pseudopilus assembly.                                                                                                                                                                                                                                                                                                                                                                                                                                                                                                                                                                                                                                                                                                                                                                                                                                                                                                              |          |
